# Supplementary material for: Double Haploid Development and Assessment of Androgenic Competence of Balkan Pepper Core Collection in Bulgaria
Source: MDPI journal article supplement (doi:10.3390/plants10112414), 2021-11-09
Supplement: s1 [file s1]

**Table S2.** Varietal group wise descriptive statistics of reacted anthers, formed embryos, and regenerants. Descriptive statistics is shown in mean, standard deviation (SD), and standard error (SE).

| Varietal Group        | Accessions | Reacted Anthers |      |       |      | Formed Embryos |       |       |       | Regenerants |      |      |      |
|-----------------------|------------|-----------------|------|-------|------|----------------|-------|-------|-------|-------------|------|------|------|
|                       |            | Total           | Mean | SD    | SE   | Total          | Mean  | SD    | SE    | Total       | Mean | SD   | SE   |
| <b>Elongate</b>       | 35         | 34              | 0.97 | 1.51  | 0.25 | 204            | 5.83  | 9.88  | 1.67  | 14          | 0.40 | 0.85 | 0.14 |
| <b>Round</b>          | 07         | 19              | 2.71 | 5.12  | 1.94 | 132            | 18.85 | 40.17 | 15.18 | 09          | 1.28 | 2.98 | 1.13 |
| <b>Conical</b>        | 96         | 262             | 2.73 | 7.01  | 0.72 | 1225           | 12.76 | 32.18 | 3.28  | 126         | 1.38 | 4.24 | 0.43 |
| <b>Bell or Blocky</b> | 17         | 75              | 4.41 | 11.16 | 2.71 | 363            | 21.35 | 48.20 | 11.69 | 23          | 1.35 | 3.59 | 0.87 |
| <b>Pumpkin Shape</b>  | 25         | 223             | 8.92 | 13.61 | 2.72 | 1277           | 51.08 | 87.98 | 17.60 | 93          | 3.72 | 6.77 | 1.35 |
